# Supplementary material for: Circulating Progenitor Cells in Patients With Coronary Artery Disease and Renal Insufficiency
Source: PubMed Central journal article supplement — JACC Basic Transl Sci. 2020 Aug 12;5(8):770–82. doi: 10.1016/j.jacbts.2020.06.006 (PMC7452291; doi:10.1016/j.jacbts.2020.06.006), 2020-08-12
Supplement: mmc1.pdf [file mmc1.pdf]

**SUPPLEMENTAL MATERIAL**

**Supplemental Table 1A:** Baseline characteristics of participants stratified by median CD34+ count

| Characteristics                            | CD34+        |              | p-value          |
|--------------------------------------------|--------------|--------------|------------------|
|                                            | Below Median | Above Median |                  |
| Estimated GFR (mL/min/1.73m <sup>2</sup> ) | 66.1 (26.3)  | 69.9 (27.0)  | <b>&lt;0.001</b> |
| Renal Insufficiency                        | 243 (38.0%)  | 203 (31.7%)  | <b>0.019</b>     |
| Age (years)                                | 67.8 (12.3)  | 63.2 (13.4)  | <b>&lt;0.001</b> |
| Male sex                                   | 367 (57.3%)  | 409 (63.8%)  | <b>0.019</b>     |
| Black race                                 | 141 (22.0%)  | 142 (22.2%)  | 1.000            |
| Diabetes                                   | 257 (40.2%)  | 256 (40.0%)  | 1.000            |
| Current smoking                            | 30 (4.7%)    | 30 (4.7%)    | 1.000            |
| Hypertension                               | 586 (91.7%)  | 570 (89.2%)  | 0.153            |
| Hypercholesterolemia                       | 474 (74.1%)  | 477 (74.4%)  | 0.898            |
| Body mass index (kg/m <sup>2</sup> )       | 28.7 (6.3)   | 30.0 (6.4)   | <b>&lt;0.001</b> |
| Hemoglobin (g/dL)                          | 12.8 (1.8)   | 13.3 (1.9)   | <b>&lt;0.001</b> |
| White blood cells (cells/microL)           | 6357 (1758)  | 7110 (1749)  | <b>&lt;0.001</b> |

|                                     |                    |                   |                  |
|-------------------------------------|--------------------|-------------------|------------------|
| CAD history                         | 546 (85.3%)        | 508 (79.3%)       | <b>0.005</b>     |
| HF history                          | 233 (36.4%)        | 218 (34.0%)       | 0.381            |
| PAD history                         | 145 (22.7%)        | 101 (15.8%)       | <b>0.002</b>     |
| Ejection fraction (%)               | 53.7 (12.3)        | 52.3 (13.3)       | 0.150            |
| High-sensitivity troponin I (pg/mL) | 6.8 [3.5-15.1]     | 6.2 [3.3-15.4]    | 0.319            |
| B-type natriuretic peptide (pg/mL)  | 114.6 [50.6-391.4] | 95.8 [39.5-226.5] | <b>0.001</b>     |
| ACEi/ARB use                        | 322 (50.3%)        | 340 (53.0%)       | 0.342            |
| Aspirin use                         | 497 (77.7%)        | 509 (79.4%)       | 0.455            |
| Beta blocker use                    | 462 (72.2%)        | 475 (74.1%)       | 0.450            |
| Clopidogrel use                     | 249 (38.9%)        | 239 (37.3%)       | 0.565            |
| Statin use                          | 455 (71.1%)        | 440 (68.6%)       | 0.361            |
| Cardiovascular death/MI             | 104 (16.6%)        | 71 (11.3%)        | <b>0.007</b>     |
| All-cause death                     | 143 (22.9%)        | 91 (14.5%)        | <b>&lt;0.001</b> |

**Supplemental Table 1B:** Baseline characteristics of participants stratified by median CD34+/CD133+ count

| Characteristics                            | CD34+/CD133+ | CD34+/CD133+ | p-value        |
|--------------------------------------------|--------------|--------------|----------------|
|                                            | Below Median | Above Median |                |
| Estimated GFR (mL/min/1.73m <sup>2</sup> ) | 67.3 (25.2)  | 68.7 (28.2)  | 0.109          |
| Renal Insufficiency                        | 226 (35.3%)  | 220 (34.3%)  | 0.725          |
| Age (years)                                | 67.9 (12.3)  | 63.1 (13.3)  | < <b>0.001</b> |
| Male sex                                   | 366 (57.2%)  | 410 (64.0%)  | <b>0.014</b>   |
| Black race                                 | 129 (20.2%)  | 154 (24.0%)  | 0.106          |
| Diabetes                                   | 243 (38.0%)  | 270 (42.2%)  | 0.138          |
| Current smoking                            | 31 (4.8%)    | 29 (4.5%)    | 0.793          |
| Hypertension                               | 582 (91.1%)  | 574 (89.8%)  | 0.505          |
| Hypercholesterolemia                       | 470 (73.4%)  | 481 (75.0%)  | 0.523          |
| Body mass index (kg/m <sup>2</sup> )       | 28.5 (6.2)   | 30.2 (6.5)   | < <b>0.001</b> |
| Hemoglobin (g/dL)                          | 12.9 (1.8)   | 13.2 (1.9)   | <b>0.003</b>   |
| White blood cells (cells/microL)           | 6373 (1735)  | 7094 (1778)  | < <b>0.001</b> |
| CAD history                                | 543 (84.8%)  | 511 (79.7%)  | <b>0.019</b>   |

|                                     |                    |                   |              |
|-------------------------------------|--------------------|-------------------|--------------|
| HF history                          | 241 (37.7%)        | 210 (32.8%)       | 0.070        |
| PAD history                         | 134 (20.9%)        | 112 (17.5%)       | 0.119        |
| Ejection fraction (%)               | 53.4 (12.7)        | 52.6 (12.9)       | 0.210        |
| High-sensitivity troponin I (pg/mL) | 6.6 [3.3-14.6]     | 6.4 [3.5-15.8]    | 0.842        |
| B-type natriuretic peptide (pg/mL)  | 110.8 [46.7-360.0] | 98.2 [41.0-237.0] | <b>0.043</b> |
| ACEi/ARB use                        | 314 (49.1%)        | 348 (54.3%)       | 0.065        |
| Aspirin use                         | 493 (77.0%)        | 513 (80.0%)       | 0.197        |
| Beta blocker use                    | 457 (71.4%)        | 480 (74.9%)       | 0.116        |
| Clopidogrel use                     | 241 (37.7%)        | 247 (38.5%)       | 0.774        |
| Statin use                          | 444 (69.4%)        | 451 (70.4%)       | 0.715        |
| Cardiovascular death/MI             | 101 (16.2%)        | 74 (11.8%)        | <b>0.028</b> |
| All-cause death                     | 139 (22.2%)        | 95 (15.1%)        | <b>0.001</b> |

---

**Supplemental Table 1C:** Baseline characteristics of participants stratified by median CD34+/CXCR4+ count

| Characteristics                            | CD34+/CXCR4+ | CD34+/CXCR4+ | p-value          |
|--------------------------------------------|--------------|--------------|------------------|
|                                            | Below Median | Above Median |                  |
| Estimated GFR (mL/min/1.73m <sup>2</sup> ) | 66.5 (26.2)  | 69.5 (27.2)  | <b>0.018</b>     |
| Renal Insufficiency                        | 236 (36.9%)  | 210 (32.8%)  | 0.128            |
| Age (years)                                | 67.1 (12.4)  | 63.9 (13.5)  | <b>&lt;0.001</b> |
| Male sex                                   | 354 (55.3%)  | 422 (65.8%)  | <b>&lt;0.001</b> |
| Black race                                 | 133 (20.8%)  | 150 (23.4%)  | 0.281            |
| Diabetes                                   | 266 (41.6%)  | 247 (38.6%)  | 0.305            |
| Current smoking                            | 31 (4.8%)    | 29 (4.5%)    | 0.793            |
| Hypertension                               | 583 (91.2%)  | 573 (89.7%)  | 0.392            |
| Hypercholesterolemia                       | 466 (72.8%)  | 485 (75.7%)  | 0.251            |
| Body mass index (kg/m <sup>2</sup> )       | 28.1 (6.3)   | 29.8 (6.4)   | <b>0.003</b>     |
| Hemoglobin (g/dL)                          | 12.7 (1.8)   | 13.4 (1.8)   | <b>&lt;0.001</b> |
| White blood cells (cells/microL)           | 6458 (1831)  | 7010 (1711)  | <b>&lt;0.001</b> |
| CAD history                                | 536 (83.8%)  | 518 (80.8%)  | 0.188            |

|                                     |                    |                   |                  |
|-------------------------------------|--------------------|-------------------|------------------|
| HF history                          | 245 (38.3%)        | 206 (32.1%)       | <b>0.023</b>     |
| PAD history                         | 142 (22.2%)        | 104 (16.2%)       | <b>0.007</b>     |
| Ejection fraction (%)               | 53.4 (12.3)        | 52.5 (13.3)       | 0.491            |
| High-sensitivity troponin I (pg/mL) | 6.7 [3.5-15.3]     | 6.4 [3.3-15.4]    | 0.423            |
| B-type natriuretic peptide (pg/mL)  | 112.1 [48.1-360.0] | 96.7 [39.4-225.5] | <b>0.006</b>     |
| ACEi/ARB use                        | 324 (50.6%)        | 338 (52.7%)       | 0.468            |
| Aspirin use                         | 503 (78.6%)        | 503 (78.6%)       | 1.000            |
| Beta blocker use                    | 466 (72.8%)        | 471 (73.5%)       | 0.801            |
| Clopidogrel use                     | 250 (39.1%)        | 238 (37.1%)       | 0.490            |
| Statin use                          | 452 (70.6%)        | 443 (69.1%)       | 0.584            |
| Cardiovascular death/MI             | 107 (17.1%)        | 68 (10.8%)        | <b>0.001</b>     |
| All-cause death                     | 141 (22.5%)        | 93 (14.8%)        | <b>&lt;0.001</b> |

---

**Supplemental Table 1D:** Baseline characteristics of participants stratified by median CD34+/VEGF2R+ count

| Characteristics                            | CD34+/VEGF2R+ | CD34+/VEGF2R+ | p-value          |
|--------------------------------------------|---------------|---------------|------------------|
|                                            | Below Median  | Above Median  |                  |
| Estimated GFR (mL/min/1.73m <sup>2</sup> ) | 66.8 (26.2)   | 69.2 (27.2)   | <b>0.049</b>     |
| Renal Insufficiency                        | 237 (37.4%)   | 209 (32.3%)   | 0.061            |
| Age (years)                                | 66.7 (12.4)   | 64.3 (13.6)   | <b>0.006</b>     |
| Male sex                                   | 361 (56.9%)   | 415 (64.1%)   | <b>0.009</b>     |
| Black race                                 | 138 (21.8%)   | 145 (22.4%)   | 0.788            |
| Diabetes                                   | 282 (44.5%)   | 231 (35.8%)   | <b>0.002</b>     |
| Current smoking                            | 31 (4.9%)     | 29 (4.5%)     | 0.792            |
| Hypertension                               | 562 (88.9%)   | 594 (92.0%)   | 0.071            |
| Hypercholesterolemia                       | 470 (74.1%)   | 481 (74.3%)   | 0.949            |
| Body mass index (kg/m <sup>2</sup> )       | 29.5 (6.6)    | 29.3 (6.2)    | 0.808            |
| Hemoglobin (g/dL)                          | 12.8 (1.7)    | 13.3 (1.8)    | <b>&lt;0.001</b> |
| White blood cells (cells/microL)           | 6664 (1820)   | 6803 (1765)   | 0.146            |
| CAD history                                | 559 (88.2%)   | 495 (76.5%)   | <b>&lt;0.001</b> |

|                                     |                    |                    |                  |
|-------------------------------------|--------------------|--------------------|------------------|
| HF history                          | 243 (38.3%)        | 208 (32.1%)        | <b>0.023</b>     |
| PAD history                         | 162 (25.6%)        | 84 (13.0%)         | <b>&lt;0.001</b> |
| Ejection fraction (%)               | 53.6 (12.1)        | 52.4 (13.5)        | 0.434            |
| High-sensitivity troponin I (pg/mL) | 6.7 [3.6-14.3]     | 6.3 [3.2-16.0]     | 0.563            |
| B-type natriuretic peptide (pg/mL)  | 105.5 [46.6-283.3] | 101.4 [40.8-263.9] | 0.393            |
| ACEi/ARB use                        | 368 (58.0%)        | 294 (45.4%)        | <b>&lt;0.001</b> |
| Aspirin use                         | 533 (84.1%)        | 473 (73.1%)        | <b>&lt;0.001</b> |
| Beta blocker use                    | 497 (78.4%)        | 440 (68.0%)        | <b>&lt;0.001</b> |
| Clopidogrel use                     | 268 (42.3%)        | 220 (34.0%)        | <b>0.003</b>     |
| Statin use                          | 484 (76.3%)        | 411 (63.5%)        | <b>&lt;0.001</b> |
| Cardiovascular death/MI             | 92 (14.8%)         | 83 (13.1%)         | 0.415            |
| All-cause death                     | 124 (20.0%)        | 110 (17.4%)        | 0.246            |

---



**Supplemental Table 2:** Predictors of circulating progenitor cell counts in the overall cohort

|                                          | CD34+                      |                  | CD34+/CD133+              |                  | CD34+/CXCR4+               |                  | CD34+/VEGF2R+              |              |
|------------------------------------------|----------------------------|------------------|---------------------------|------------------|----------------------------|------------------|----------------------------|--------------|
|                                          | Beta (95% CI)              | p-value          | Beta (95% CI)             | p-value          | Beta (95% CI)              | p-value          | Beta (95% CI)              | p-value      |
| eGFR<br>(per mL/min/1.73m <sup>2</sup> ) | 0.003<br>(0.001, 0.005)    | <b>0.003</b>     | 0.003<br>(0.001, 0.006)   | <b>0.010</b>     | 0.003<br>(0.0001, 0.005)   | <b>0.029</b>     | 0.004<br>(-0.004, 0.011)   | 0.343        |
| Age (per year)                           | -0.015<br>(-0.019, -0.011) | <b>&lt;0.001</b> | -0.020<br>(-0.024, 0.015) | <b>&lt;0.001</b> | -0.013<br>(-0.018, -0.008) | <b>&lt;0.001</b> | -0.026<br>(-0.041, -0.011) | <b>0.001</b> |
| Male sex                                 | 0.178<br>(0.067, 0.288)    | <b>0.002</b>     | 0.160<br>(0.026, 0.293)   | <b>0.019</b>     | 0.199<br>(0.069, 0.330)    | <b>0.003</b>     | 0.478<br>(0.082, 0.875)    | <b>0.018</b> |
| Race                                     | 0.040<br>(-0.091, 0.170)   | 0.554            | 0.166<br>(0.009, 0.323)   | <b>0.039</b>     | 0.118<br>(-0.036, 0.272)   | 0.134            | 0.259<br>(-0.209, 0.728)   | 0.278        |
| Diabetes                                 | 0.001<br>(-0.110, 0.111)   | 0.992            | 0.057<br>(-0.076, 0.190)  | 0.402            | -0.050<br>(-0.181, 0.081)  | 0.454            | -0.571<br>(-0.996, -0.176) | <b>0.005</b> |
| Current smoking                          | -0.076<br>(-0.332, 0.180)  | 0.561            | 0.029<br>(-0.279, 0.338)  | 0.852            | -0.146<br>(-0.448, 0.156)  | 0.344            | -0.098<br>(-1.016, 0.819)  | 0.833        |
| Hypertension                             | 0.148                      | 0.117            | -0.184                    | 0.104            | -0.159                     | 0.152            | -0.053                     | 0.875        |

|                              |                            |                  |                            |                  |                            |                  |                            |                  |
|------------------------------|----------------------------|------------------|----------------------------|------------------|----------------------------|------------------|----------------------------|------------------|
|                              | (0.332, 0.037)             |                  | (-0.406, 0.038)            |                  | (-0.377, 0.058)            |                  | (-0.713, 0.608)            |                  |
| Hypercholesterolemia         | 0.019<br>(-0.105, 0.143)   | 0.768            | 0.024<br>(-0.126, 0.173)   | 0.757            | 0.035<br>(-0.112, 0.181)   | 0.641            | -0.010<br>(-0.454, 0.434)  | 0.965            |
| BMI (per kg/m <sup>2</sup> ) | 0.020<br>(0.011, 0.028)    | <b>&lt;0.001</b> | 0.026<br>(0.016, 0.036)    | <b>&lt;0.001</b> | 0.013<br>(0.003, 0.023)    | <b>0.010</b>     | -0.023<br>(-0.053, 0.007)  | 0.139            |
| CAD history                  | -0.123<br>(-0.265, 0.020)  | 0.091            | -0.145<br>(-0.317, 0.027)  | 0.097            | -0.187<br>(-0.354, -0.019) | <b>0.030</b>     | -1.032<br>(-1.540, -0.525) | <b>&lt;0.001</b> |
| HF history                   | -0.153<br>(-0.226, -0.039) | <b>0.008</b>     | -0.111<br>(-0.247, 0.026)  | 0.113            | -0.182<br>(-0.316, -0.049) | <b>0.008</b>     | -0.170<br>(-0.577, 0.237)  | 0.413            |
| PAD history                  | -0.234<br>(-0.371, 0.096)  | <b>0.001</b>     | -0.200<br>(-0.366, -0.034) | <b>0.018</b>     | -0.290<br>(-0.452, 0.128)  | <b>&lt;0.001</b> | -1.137<br>(-1.627, -0.647) | <b>&lt;0.001</b> |
| Hemoglobin (per g/dL)        | 0.102<br>(0.073, 0.131)    | <b>&lt;0.001</b> | 0.091<br>(0.056, 0.126)    | <b>&lt;0.001</b> | 0.114<br>(0.080, 0.147)    | <b>&lt;0.001</b> | 0.176<br>(0.072, 0.280)    | <b>0.001</b>     |
| WBC (per 1000 cells/microL)  | 0.145<br>(0.116, 0.175)    | <b>&lt;0.001</b> | 0.144<br>(0.109, 0.180)    | <b>&lt;0.001</b> | 0.110<br>(0.074, 0.145)    | <b>&lt;0.001</b> | 0.052<br>(-0.056, 0.890)   | 0.346            |
| Ejection Fraction (per 1%)   | -0.001                     | 0.551            | -0.003                     | 0.296            | -0.0004                    | 0.870            | -0.012                     | 0.139            |

|                    |                            |                  |                            |                  |                            |                  |                             |                  |
|--------------------|----------------------------|------------------|----------------------------|------------------|----------------------------|------------------|-----------------------------|------------------|
|                    | (-0.006, 0.003)            |                  | (-0.008, 0.002)            |                  | (-0.006, 0.005)            |                  | (-0.027, 0.004)             |                  |
| hsTnI (per 1-unit) | -0.065<br>(-0.109, -0.022) | <b>0.003</b>     | -0.046<br>(-0.099, 0.006)  | 0.085            | -0.077<br>(-0.128, -0.025) | <b>0.004</b>     | 0.020<br>(-0.136, 0.177)    | 0.799            |
| BNP (per 1-unit)   | -0.106<br>(-0.147, -0.066) | <b>&lt;0.001</b> | -0.103<br>(-0.153, -0.053) | <b>&lt;0.001</b> | -0.102<br>(-0.151, -0.052) | <b>&lt;0.001</b> | -0.067<br>(-0.219, 0.084)   | 0.382            |
| ACEi/ARB use       | 0.084<br>(-0.024, 0.193)   | 0.129            | 0.096<br>(-0.035, 0.227)   | 0.149            | -0.056<br>(-0.184, 0.072)  | 0.389            | -0.516<br>(-0.904, -0.128)  | <b>0.009</b>     |
| Aspirin use        | 0.053<br>(-0.079, 0.185)   | 0.432            | 0.102<br>(-0.057, 0.261)   | 0.208            | -0.003<br>(-0.159, 0.153)  | 0.972            | -0.852<br>(-0.1323, -0.381) | <b>&lt;0.001</b> |
| Beta blocker use   | 0.044<br>(-0.079, 0.166)   | 0.484            | 0.147<br>(-0.0001, 0.295)  | 0.050            | -0.021<br>(-0.165, 0.124)  | 0.779            | -0.736<br>(-1.172, -0.299)  | <b>0.001</b>     |
| Clopidogrel use    | -0.026<br>(-0.138, 0.085)  | 0.643            | -0.062<br>(-0.197, 0.072)  | 0.364            | -0.084<br>(-0.215, 0.048)  | 0.213            | -0.543<br>(-0.942, -0.144)  | <b>0.008</b>     |
| Statin use         | -0.001<br>(-0.120, 0.118)  | 0.989            | 0.033<br>(-0.110, 0.176)   | 0.652            | -0.114<br>(-0.254, 0.026)  | 0.110            | -0.858<br>(-1.280, -0.436)  | <b>&lt;0.001</b> |

Dependent variables are log-transformed PC counts. hsTnI and BNP are non-normally distributed and were log-transformed during analysis. eGFR=estimated glomerular filtration rate, CAD=coronary artery disease, HF=heart failure, PAD=peripheral artery disease,

ACEi=angiotensin converting enzyme inhibitor, ARB=angiotensin-II receptor blocker, hsTnI=high-sensitivity troponin I, BNP=B-type natriuretic peptide, CD=cluster of differentiation, VEGF2R=vascular endothelial growth factor receptor 2, CXCR4=C-X-C chemokine receptor type 4.

**Supplemental Table 3:** Association of dialysis with circulating progenitor cell counts

|                | CD34+                                    |              | CD34+/CD133+              |         | CD34+/CXCR4+                             |                  | CD34+/VEGF2R+              |         |
|----------------|------------------------------------------|--------------|---------------------------|---------|------------------------------------------|------------------|----------------------------|---------|
|                | Beta (95% CI)                            | p-value      | Beta (95% CI)             | p-value | Beta (95% CI)                            | p-value          | Beta (95% CI)              | p-value |
| <b>Model 1</b> |                                          |              |                           |         |                                          |                  |                            |         |
| Overall        | -10.2%<br>(-23.2%, 5.0%)                 | 0.176        | -0.9%<br>(-17.9%, 19.5%)  | 0.925   | -7.3%<br>(-23.0%, 11.7%)                 | 0.427            | -5.0%<br>(-46.1%, 67.5%)   | 0.859   |
| Age <70 years  | -4.9%<br>(-19.4%, 12.3%)                 | 0.556        | 3.0%<br>(-14.5%, 24.1%)   | 0.752   | 1.7%<br>(-16.7%, 24.1%)                  | 0.870            | 0.9%<br>(-43.7%, 70.8%)    | 0.997   |
| Age ≥70 years  | <b>-56.4%</b><br><b>(-75.3%, -23.2%)</b> | <b>0.004</b> | -38.3%<br>(-71.2%, 31.9%) | 0.213   | <b>-70.5%</b><br><b>(-84.7%, -43.3%)</b> | <b>&lt;0.001</b> | -66.1%<br>(-96.1%, 196.6%) | 0.329   |
| <b>Model 2</b> |                                          |              |                           |         |                                          |                  |                            |         |
| Overall        | -3.9%<br>(-18.1%, 12.9%)                 | 0.629        | 2.9%<br>(-15.1%, 25.2%)   | 0.776   | -1.2%<br>(-18.7%, 20.1%)                 | 0.901            | 10.8%<br>(-39.4%, 102.8%)  | 0.738   |
| Age <70 years  | 1.1%<br>(-15.0%, 20.3%)                  | 0.903        | 5.3%<br>(-13.5%, 28.3%)   | 0.605   | 7.6%<br>(-13.3%, 33.5%)                  | 0.505            | 16.9%<br>(-38.2%, 120.9%)  | 0.632   |

|                     |                                                          |                                    |                                                          |                                     |
|---------------------|----------------------------------------------------------|------------------------------------|----------------------------------------------------------|-------------------------------------|
| Age $\geq$ 70 years | <b>-49.5%</b><br><b>(-70.8%, -12.8%)</b><br><b>0.014</b> | -29.5%<br>(-66.7%, 49.2%)<br>0.361 | <b>-66.5%</b><br><b>(-82.2%, -36.8%)</b><br><b>0.001</b> | -59.4%<br>(-95.1%, 238.1%)<br>0.405 |
|---------------------|----------------------------------------------------------|------------------------------------|----------------------------------------------------------|-------------------------------------|

Dependent variables are log-transformed CPC counts. Model 1 adjusted for continuous age. Model 2 adjusted for continuous age, sex, race, diabetes, current smoking, hypertension, hypercholesterolemia, body mass index, hemoglobin, white blood cell count, CAD history, HF history, PAD history, and cardiovascular medication use (ACEi/ARB, aspirin, beta blocker, clopidogrel, and statin). CI=confidence interval, other abbreviations are same as Table 1.

**Supplemental Table 4:** Association of renal insufficiency with adverse outcomes

|                             | Cardiovascular Death/MI |         | All-Cause Mortality   |         |
|-----------------------------|-------------------------|---------|-----------------------|---------|
|                             | Hazard Ratio (95% CI)   | p-value | Hazard Ratio (95% CI) | p-value |
| <b>Multivariable Model*</b> | 1.48 (1.08-2.03)        | 0.014   | 1.39 (1.06-1.83)      | 0.019   |
| <b>Model 1</b>              |                         |         |                       |         |
| Renal Insufficiency         | 1.45 (1.06-1.99)        | 0.021   | 1.35 (1.02-1.79)      | 0.033   |
| CD34+                       | 1.21 (1.05-1.39)        | 0.010   | 1.19 (1.05-1.35)      | 0.006   |
| <b>Model 2</b>              |                         |         |                       |         |
| Renal Insufficiency         | 1.46 (1.06-2.00)        | 0.020   | 1.37 (1.04-1.81)      | 0.025   |
| CD34+/CD133+                | 1.18 (1.07-1.31)        | 0.001   | 1.15 (1.04-1.26)      | 0.004   |
| <b>Model 3</b>              |                         |         |                       |         |
| Renal Insufficiency         | 1.45 (1.06-1.99)        | 0.022   | 1.35 (1.02-1.79)      | 0.034   |
| CD34+/CXCR4+                | 1.25 (1.10-1.42)        | 0.001   | 1.20 (1.07-1.36)      | 0.002   |
| <b>Model 4</b>              |                         |         |                       |         |
| Renal Insufficiency         | 1.49 (1.09-2.04)        | 0.013   | 1.40 (1.06-1.84)      | 0.017   |
| CD34+/VEGF2R+               | 1.02 (0.98-1.06)        | 0.420   | 1.04 (0.99-1.08)      | 0.069   |

Multivariable Cox models included age, eGFR, sex, race, diabetes, current smoking, hypertension, hypercholesterolemia, body mass index, hemoglobin, white blood cell count, CAD history, HF history, PAD history, ACEi/ARB use, aspirin use, beta blocker use, clopidogrel use, and statin use as covariates. Stepwise Cox regression using backward elimination with model removal p-threshold=0.10 was used to analyze all covariates.



**Supplemental Table 5:** Independent determinants of adverse outcomes in patients with renal insufficiency

| <b>Cardiovascular Death/MI</b>        |                           | <b>All-Cause Mortality</b>            |                            |
|---------------------------------------|---------------------------|---------------------------------------|----------------------------|
| <b>Hazard Ratio (95% CI), p-value</b> |                           | <b>Hazard Ratio (95% CI), p-value</b> |                            |
| Age (per year)                        | 1.05 (1.03-1.07), p<0.001 | Age (per year)                        | 1.02 (1.01-1.04), p=0.007  |
| eGFR (per mL/min/1.73m <sup>2</sup> ) | 0.98 (0.96-0.99), p=0.001 | eGFR (per mL/min/1.73m <sup>2</sup> ) | 0.98 (0.97-0.996), p=0.011 |
| Current Smoking                       | 2.53 (1.07-6.00), p=0.034 | Race                                  | 0.54 (0.32-0.90), p=0.018  |
| HF history                            | 1.90 (1.22-2.95), p=0.005 | HF history                            | 2.02 (1.38-2.95), p<0.001  |
| Hemoglobin (per 1-g/dl)               | 0.85 (0.75-0.97), p=0.014 | Hemoglobin (per 1-g/dl)               | 0.83 (0.74-0.92), p=0.001  |
|                                       |                           | ACEi/ARB use                          | 0.52 (0.36-0.76), p=0.001  |

Renal insufficiency is the exposure variable of interest. \*Model adjusted for age, sex, race, diabetes, current smoking, hypertension, hypercholesterolemia, body mass index, hemoglobin, white blood cell count, CAD history, HF history, PAD history, ACEi/ARB use, aspirin use, beta blocker use, clopidogrel use, and statin use as covariates. Stepwise Cox regression using backward elimination with model removal p-threshold=0.10 was used to analyze all covariates. Log-transformed CPC counts were added sequentially to the multivariable model.

**Supplemental Table 6:** Association of CPC counts with CV death/MI events using Fine and Gray competing risk regression models

|                    | CD34+                    |                  | CD34+/CD133+             |                  | CD34+/CXCR4+             |                  | CD34+/VEGF2R+     |         |
|--------------------|--------------------------|------------------|--------------------------|------------------|--------------------------|------------------|-------------------|---------|
|                    | HR (95% CI)              | p-value          | HR (95% CI)              | p-value          | HR (95% CI)              | p-value          | HR (95% CI)       | p-value |
| <b>CV death/MI</b> |                          |                  |                          |                  |                          |                  |                   |         |
| Univariable        | <b>1.44 (1.24, 1.67)</b> | <b>&lt;0.001</b> | <b>1.27 (1.17, 1.38)</b> | <b>&lt;0.001</b> | <b>1.37 (1.17, 1.60)</b> | <b>&lt;0.001</b> | 0.99 (0.94, 1.06) | 0.902   |
| Multivariable      | <b>1.32 (1.13, 1.54)</b> | <b>&lt;0.001</b> | <b>1.29 (1.19, 1.40)</b> | <b>&lt;0.001</b> | <b>1.31 (1.12, 1.54)</b> | <b>&lt;0.001</b> | 0.97 (0.91, 1.05) | 0.484   |

Multivariable Fine and Gray competing risk regression models included log-transformed CPC count, eGFR, age, sex, race, diabetes, current smoking, hypertension, hypercholesterolemia, body mass index, hemoglobin, white blood cell count, CAD history, HF history, PAD history, ACEi/ARB use, aspirin use, beta blocker use, clopidogrel use, and statin use as covariates. Stepwise regression using backward elimination with model removal p-threshold=0.10 was used to analyze all covariates. CPC=circulating progenitor cell, HR=hazard ratio, CI=confidence interval, CV=cardiovascular, MI=myocardial infarction.

**Supplemental Table 7:** Independent association of CPC counts with adverse outcomes in patients with renal insufficiency

|                            | CD34+                   |              | CD34+/CD133+            |                  | CD34+/CXCR4+            |              | CD34+/VEGF2R+     |         |
|----------------------------|-------------------------|--------------|-------------------------|------------------|-------------------------|--------------|-------------------|---------|
|                            | HR (95% CI)             | p-value      | HR (95% CI)             | p-value          | HR (95% CI)             | p-value      | HR (95% CI)       | p-value |
| <b>CV death/MI</b>         |                         |              |                         |                  |                         |              |                   |         |
| Multivariable + hsTnI      | <b>1.24 (1.01-1.51)</b> | <b>0.037</b> | <b>1.26 (1.13-1.41)</b> | <b>&lt;0.001</b> | <b>1.25 (1.03-1.52)</b> | <b>0.026</b> | 0.99 (0.93, 1.07) | 0.870   |
| Multivariable + BNP        | <b>1.29 (1.04-1.60)</b> | <b>0.020</b> | <b>1.28 (1.14-1.44)</b> | <b>&lt;0.001</b> | <b>1.30 (1.06-1.60)</b> | <b>0.012</b> | 1.02 (0.95-1.09)  | 0.638   |
| <b>All-cause mortality</b> |                         |              |                         |                  |                         |              |                   |         |
| Multivariable + hsTnI      | 1.12 (0.93-1.34)        | 0.222        | <b>1.18 (1.05-1.32)</b> | <b>0.006</b>     | 1.09 (0.91-1.31)        | 0.368        | 0.97 (0.91-1.03)  | 0.367   |
| Multivariable + BNP        | 1.16 (0.67-1.40)        | 0.106        | <b>1.18 (1.05-1.32)</b> | <b>0.005</b>     | 1.13 (0.94-1.36)        | 0.207        | 0.98 (0.92-1.05)  | 0.609   |

Multivariable Cox models included log-transformed CPC count, eGFR, age, sex, race, diabetes, current smoking, hypertension, hypercholesterolemia, body mass index, hemoglobin, white blood cell count, CAD history, HF history, PAD history, ACEi/ARB use, aspirin use, beta blocker use, clopidogrel use, and statin use as covariates. Stepwise Cox regression using backward elimination with model removal p-threshold=0.10 was used to analyze all covariates. Log-transformed hsTnI and BNP were added to multivariable models.

**Supplemental Table 8:** Association of CPC count and RI categories CV death/MI events using Fine and Gray competing risk regression models

| <b>CV death/MI</b>                                 |                         |                |
|----------------------------------------------------|-------------------------|----------------|
|                                                    | <b>HR (95% CI)</b>      | <b>p-value</b> |
| <b>CD34+</b>                                       |                         |                |
| No Renal Insufficiency                             | Referent                |                |
| Renal Insufficiency and Count $\geq 1507$ cells/mL | 1.12 (0.74-1.72)        | 0.586          |
| Renal Insufficiency and Count $< 1507$ cells/mL    | <b>1.67 (1.18-2.37)</b> | <b>0.004</b>   |
| <b>CD34+/CD133+</b>                                |                         |                |
| No Renal Insufficiency                             | Referent                |                |
| Renal Insufficiency and Count $\geq 741$ cells/mL  | 1.08 (0.71-1.64)        | 0.791          |
| Renal Insufficiency and Count $< 741$ cells/mL     | <b>1.72 (1.21-2.44)</b> | <b>0.003</b>   |
| <b>CD34+/CXCR4+</b>                                |                         |                |
| No Renal Insufficiency                             | Referent                |                |
| Renal Insufficiency and Count $\geq 762$ cells/mL  | 1.13 (0.75-1.70)        | 0.547          |

|                                             |                         |              |
|---------------------------------------------|-------------------------|--------------|
| Renal Insufficiency and Count <762 cells/mL | <b>1.68 (1.17-2.40)</b> | <b>0.005</b> |
|---------------------------------------------|-------------------------|--------------|

Multivariable Fine and Gray competing risk regression models include renal insufficiency and CPC count category, eGFR, age, sex, race, diabetes, current smoking, hypertension, hypercholesterolemia, body mass index, hemoglobin, white blood cell count, CAD history, HF history, PAD history, ACEi/ARB use, aspirin use, beta blocker use, clopidogrel use, and statin use as covariates. Stepwise regression using backward elimination with model removal p-threshold=0.10 was used to analyze all covariates. HR=hazard ratio, CI=confidence interval, CV=cardiovascular, MI=myocardial infarction, rest of the abbreviations are the same as Table 1.

Supplemental Figure 1: Fluorescence-Activated Cell Sorting analysis

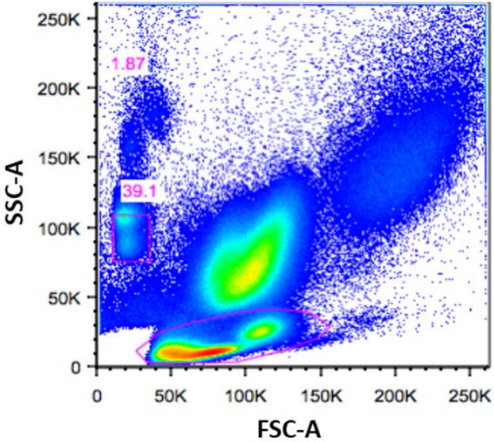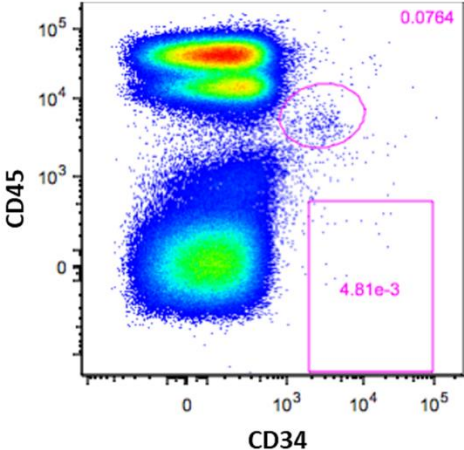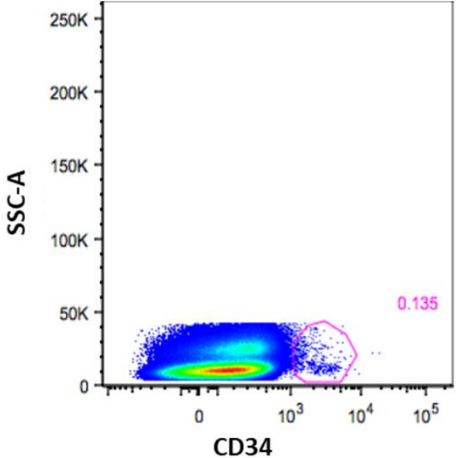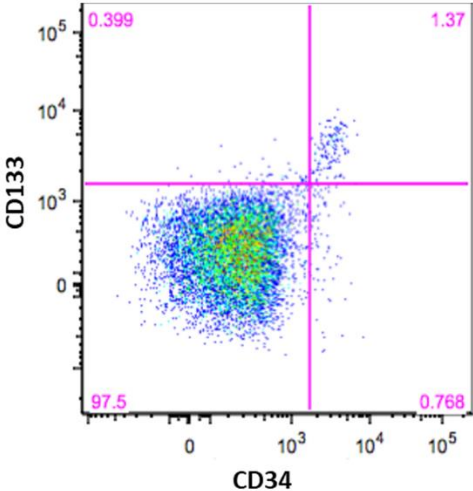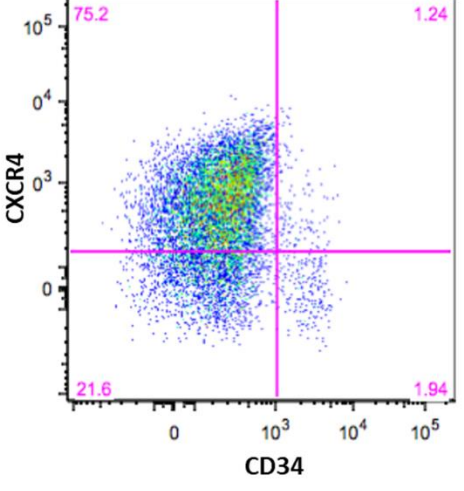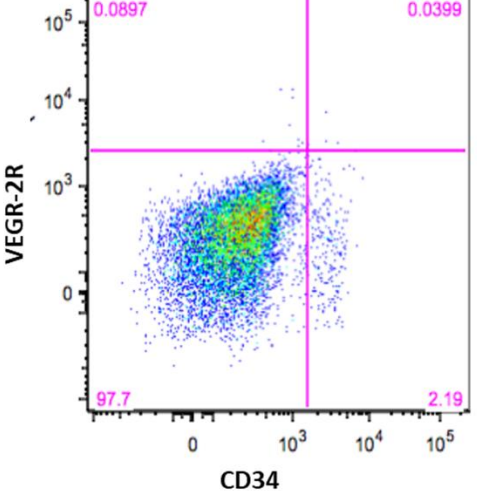

**Supplemental Figure 2:** Association of renal insufficiency with circulating progenitor cell counts across age percentiles (25<sup>th</sup> percentile=57.2 years, 40<sup>th</sup> percentile=62.7 years, 50<sup>th</sup> percentile=65.9 years, 60<sup>th</sup> percentile=69.0 years, 75<sup>th</sup> percentile=75.2 years)

**A. Renal Insufficiency and CD34+ Counts**

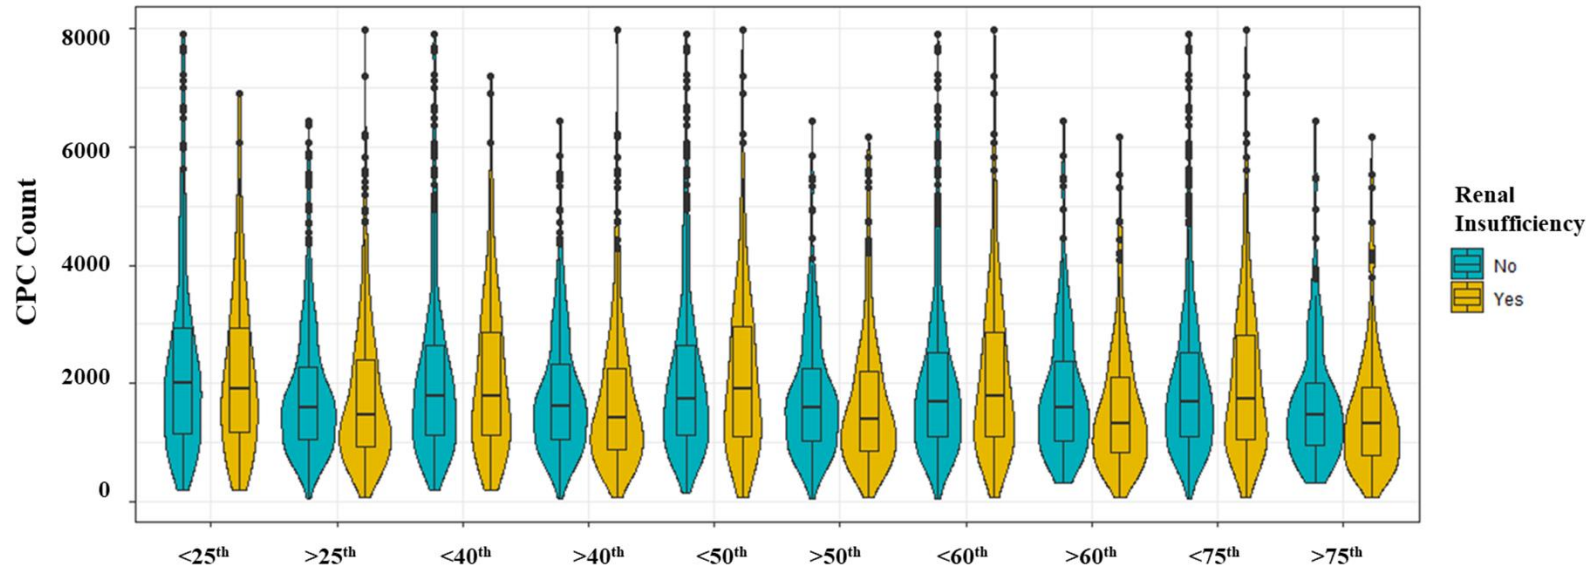

| Participant N      | No RI 242<br>RI 77  | No RI 593<br>RI 369 | No RI 382<br>RI 130 | No RI 453<br>RI 316 | No RI 472<br>RI 168 | No RI 363<br>RI 278 | No RI 561<br>RI 208 | No RI 274<br>RI 238 | No RI 691<br>RI 270 | No RI 144<br>RI 176 |
|--------------------|---------------------|---------------------|---------------------|---------------------|---------------------|---------------------|---------------------|---------------------|---------------------|---------------------|
| <b>No RI Count</b> | 2022<br>[1173,3042] | 1601<br>[1048,2295] | 1783<br>[1117,2693] | 1616<br>[1048,2352] | 1753<br>[1119,2696] | 1601<br>[1028,2262] | 1705<br>[1106,2630] | 1610<br>[1043,2303] | 1712<br>[1114,2566] | 1445<br>[945,2014]  |
| <b>RI Count</b>    | 1902<br>[1170,2946] | 1461<br>[937,2429]  | 1777<br>[1129,2899] | 1430<br>[885,2250]  | 1933<br>[1104,2972] | 1397<br>[861,2199]  | 1802<br>[1085,2847] | 1344<br>[516,2149]  | 1737<br>[1052,2839] | 1313<br>[760,1948]  |
| <b>P-value</b>     | 0.374               | 0.124               | 0.951               | <b>0.035</b>        | 0.640               | <b>0.018</b>        | 0.524               | <b>0.003</b>        | 0.794               | 0.053               |

**Supplemental Figure 2:** Association of renal insufficiency with circulating progenitor cell counts across age percentiles (25<sup>th</sup> percentile=57.2 years, 40<sup>th</sup> percentile=62.7 years, 50<sup>th</sup> percentile=65.9 years, 60<sup>th</sup> percentile=69.0 years, 75<sup>th</sup> percentile=75.2 years)

**B. Renal Insufficiency and CD34+/CD133+ Counts**

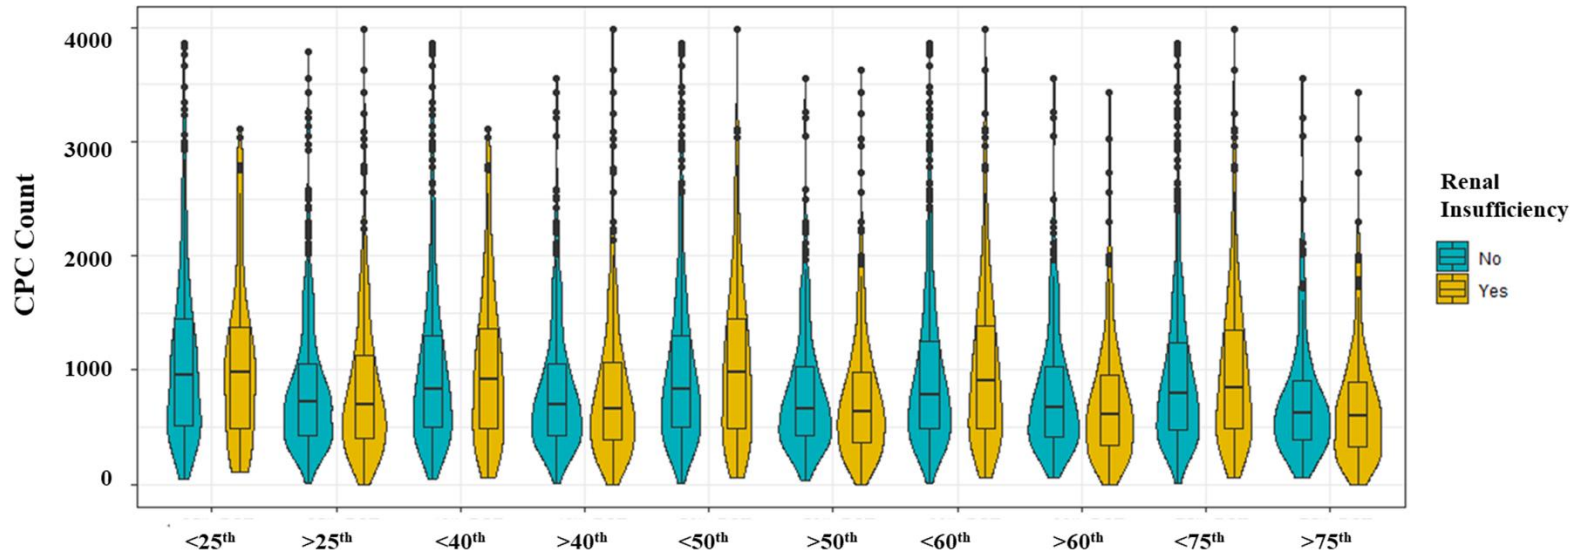

| Participant N      | No RI 242<br>RI 77 | No RI 593<br>RI 369 | No RI 382<br>RI 130 | No RI 453<br>RI 316 | No RI 472<br>RI 168 | No RI 363<br>RI 278 | No RI 561<br>RI 208 | No RI 274<br>RI 238 | No RI 691<br>RI 270 | No RI 144<br>RI 176 |
|--------------------|--------------------|---------------------|---------------------|---------------------|---------------------|---------------------|---------------------|---------------------|---------------------|---------------------|
| <b>No RI Count</b> | 998<br>[514,1531]  | 722<br>[431,1065]   | 849<br>[500,1378]   | 702<br>[429,1065]   | 845<br>[500,1376]   | 669<br>[423,1030]   | 802<br>[484,1318]   | 668<br>[424,1037]   | 797<br>[484,1287]   | 621<br>[376,911]    |
| <b>RI Count</b>    | 972<br>[462,1371]  | 703<br>[402,1142]   | 823<br>[492,1377]   | 659<br>[397,1093]   | 979<br>[493,1507]   | 637<br>[372,992]    | 923<br>[506,1387]   | 615<br>[342,970]    | 856<br>[487,1350]   | 647<br>[369,1070]   |
| <b>P-value</b>     | 0.297              | 0.570               | 0.990               | 0.318               | 0.523               | 0.250               | 0.285               | 0.059               | 0.494               | 0.328               |



**Supplemental Figure 2:** Association of renal insufficiency with circulating progenitor cell counts across age percentiles (25<sup>th</sup> percentile=57.2 years, 40<sup>th</sup> percentile=62.7 years, 50<sup>th</sup> percentile=65.9 years, 60<sup>th</sup> percentile=69.0 years, 75<sup>th</sup> percentile=75.2 years)

**C. Renal Insufficiency and CD34+/CXCR4+ Counts**

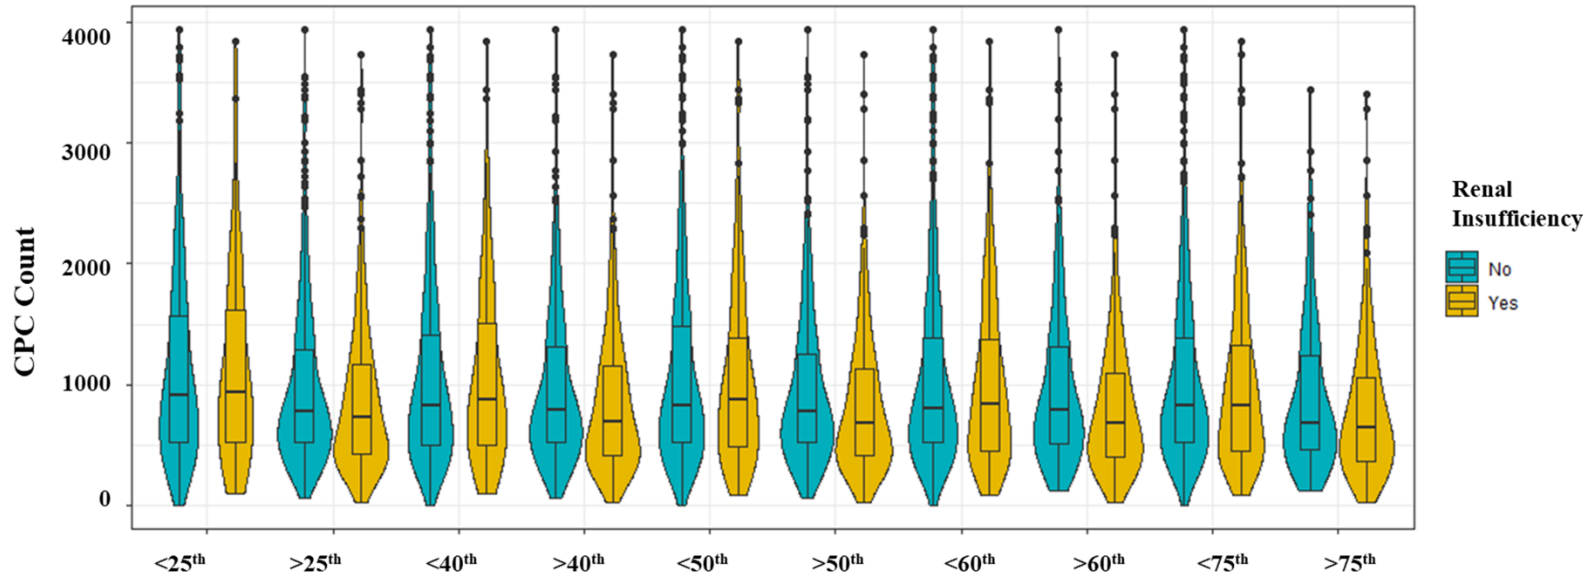

|                      | <25 <sup>th</sup>  | >25 <sup>th</sup>   | <40 <sup>th</sup>   | >40 <sup>th</sup>   | <50 <sup>th</sup>   | >50 <sup>th</sup>   | <60 <sup>th</sup>   | >60 <sup>th</sup>   | <75 <sup>th</sup>   | >75 <sup>th</sup>   |
|----------------------|--------------------|---------------------|---------------------|---------------------|---------------------|---------------------|---------------------|---------------------|---------------------|---------------------|
| <b>Participant N</b> | No RI 242<br>RI 77 | No RI 593<br>RI 369 | No RI 382<br>RI 130 | No RI 453<br>RI 316 | No RI 472<br>RI 168 | No RI 363<br>RI 278 | No RI 561<br>RI 208 | No RI 274<br>RI 238 | No RI 691<br>RI 270 | No RI 144<br>RI 176 |
| <b>No RI Count</b>   | 940<br>[533,1654]  | 784<br>[515,1312]   | 845<br>[511,1516]   | 786<br>[521,1326]   | 842<br>[520,1520]   | 785<br>[515,1281]   | 820<br>[520,1488]   | 797<br>[515,1305]   | 835<br>[528,1457]   | 699<br>[459,1450]   |
| <b>RI Count</b>      | 947<br>[517,1690]  | 731<br>[424,1188]   | 878<br>[500,1615]   | 712<br>[410,1176]   | 880<br>[490,1551]   | 688<br>[411,1145]   | 872<br>[469,1423]   | 675<br>[411,1132]   | 847<br>[452,1366]   | 599<br>[328,891]    |
| <b>P-value</b>       | 0.763              | <b>0.028</b>        | 0.849               | <b>0.007</b>        | 0.976               | <b>0.011</b>        | 0.888               | <b>0.007</b>        | 0.381               | 0.181               |

**Supplemental Figure 2:** Association of renal insufficiency with circulating progenitor cell counts across age percentiles (25<sup>th</sup> percentile=57.2 years, 40<sup>th</sup> percentile=62.7 years, 50<sup>th</sup> percentile=65.9 years, 60<sup>th</sup> percentile=69.0 years, 75<sup>th</sup> percentile=75.2 years)

**D. Renal Insufficiency and CD34+/VEGF2R+ Counts**

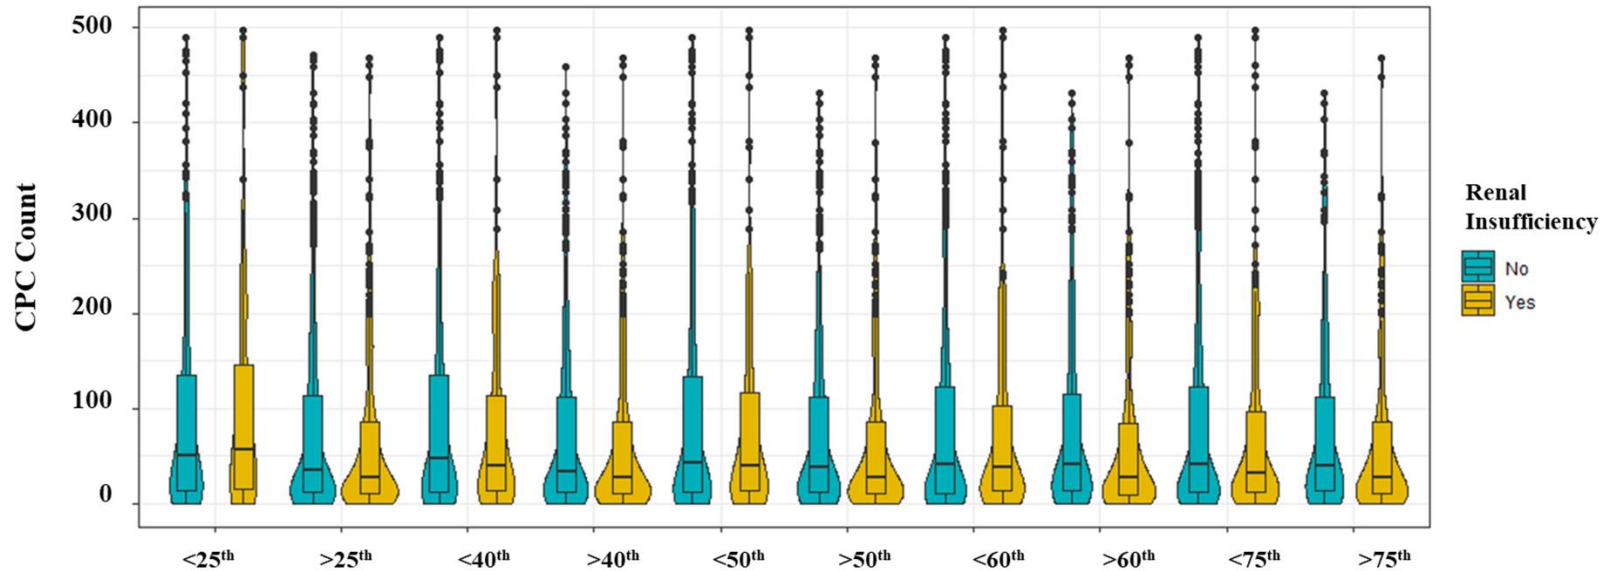

| Participant N | No RI 242<br>RI 77 | No RI 593<br>RI 369 | No RI 382<br>RI 130 | No RI 453<br>RI 316 | No RI 472<br>RI 168 | No RI 363<br>RI 278 | No RI 561<br>RI 208 | No RI 274<br>RI 238 | No RI 691<br>RI 270 | No RI 144<br>RI 176 |
|---------------|--------------------|---------------------|---------------------|---------------------|---------------------|---------------------|---------------------|---------------------|---------------------|---------------------|
| No RI Count   | 58<br>[14,166]     | 41<br>[12,140]      | 52<br>[13,155]      | 41<br>[12,140]      | 49<br>[12,155]      | 41<br>[13,130]      | 48<br>[12,146]      | 42<br>[13,148]      | 47<br>[12,146]      | 43<br>[13,145]      |
| RI Count      | 74<br>[18,213]     | 31<br>[11,93]       | 45<br>[13,142]      | 32<br>[11,101]      | 45<br>[14,137]      | 30<br>[11,93]       | 41<br>[14,127]      | 29<br>[9,98]        | 40<br>[13,129]      | 30<br>[11,92]       |
| P-value       | 0.524              | 0.051               | 0.618               | 0.104               | 0.862               | <b>0.039</b>        | 0.756               | <b>0.033</b>        | 0.407               | 0.079               |

**Supplemental Figure 3: Circulating progenitor cell counts among participants with and without cardiovascular events**

**A. CD34+ Counts**

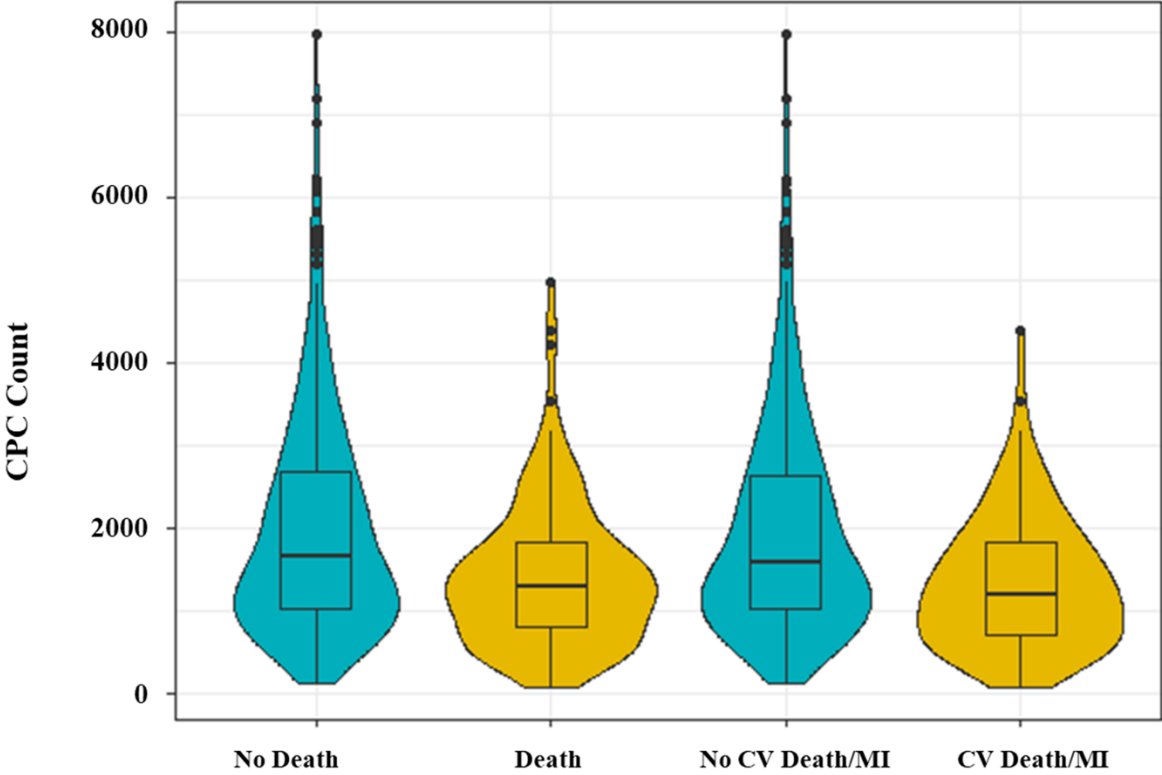

|                |                            |                           |                            |                           |
|----------------|----------------------------|---------------------------|----------------------------|---------------------------|
| <b>N</b>       | <b>318</b>                 | <b>118</b>                | <b>347</b>                 | <b>89</b>                 |
| <b>Counts</b>  | <b>1639</b><br>[1014,2679] | <b>1280</b><br>[784,1843] | <b>1581</b><br>[1015,2649] | <b>1184</b><br>[657,1819] |
| <b>P-value</b> | <b>&lt;0.001</b>           |                           | <b>&lt;0.001</b>           |                           |

**Supplemental Figure 3: Circulating progenitor cell counts among participants with and without cardiovascular events**

**B. CD34+/CD133+ Counts**

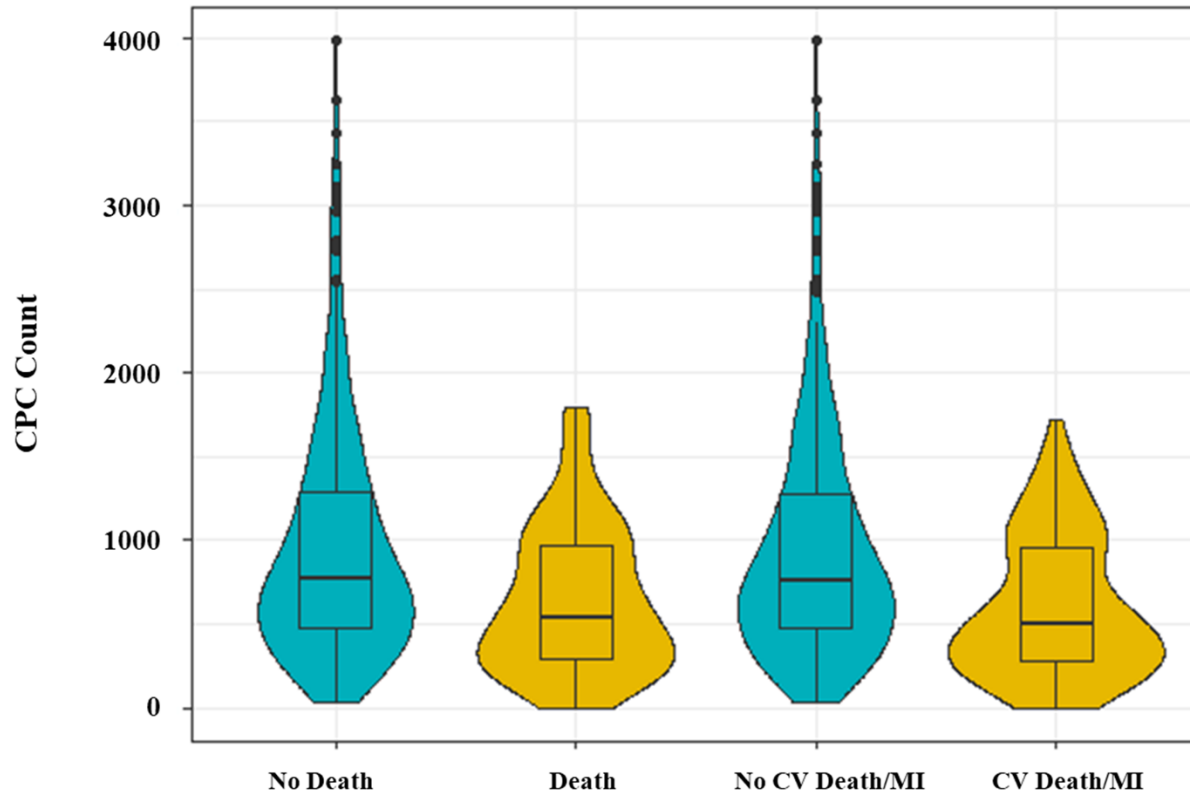

|                |                          |                         |                          |                         |
|----------------|--------------------------|-------------------------|--------------------------|-------------------------|
| <b>N</b>       | <b>318</b>               | <b>118</b>              | <b>347</b>               | <b>89</b>               |
| <b>Counts</b>  | <b>774</b><br>[471,1290] | <b>542</b><br>[289,967] | <b>765</b><br>[472,1283] | <b>497</b><br>[271,963] |
| <b>P-value</b> | <b>&lt;0.001</b>         |                         | <b>&lt;0.001</b>         |                         |

**Supplemental Figure 3: Circulating progenitor cell counts among participants with and without cardiovascular events**

**C. CD34+/CXCR4+ Counts**

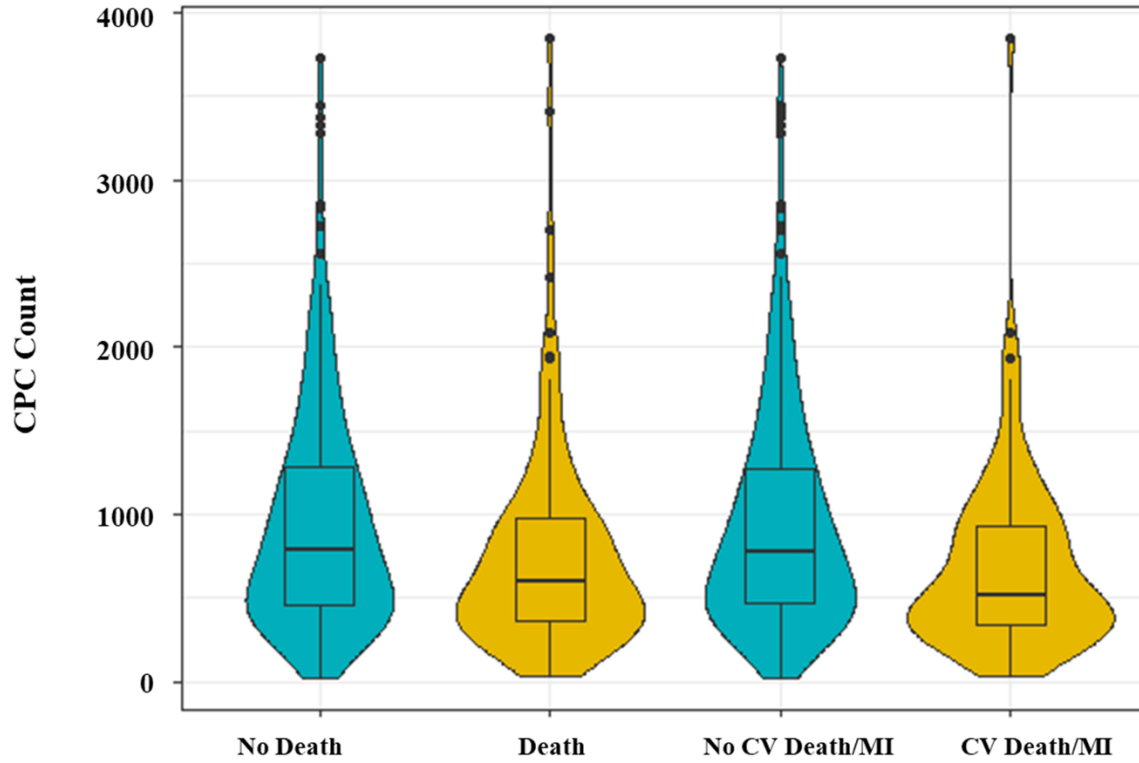

|                |                          |                         |                          |                         |
|----------------|--------------------------|-------------------------|--------------------------|-------------------------|
| <b>N</b>       | <b>318</b>               | <b>118</b>              | <b>347</b>               | <b>89</b>               |
| <b>Counts</b>  | <b>810</b><br>[465,1361] | <b>599</b><br>[358,991] | <b>794</b><br>[473,1352] | <b>518</b><br>[336,949] |
| <b>P-value</b> | <b>&lt;0.001</b>         |                         | <b>&lt;0.001</b>         |                         |

**Supplemental Figure 3: Circulating progenitor cell counts among participants with and without cardiovascular events**

**D. CD34+/VEGF2R+ Counts**

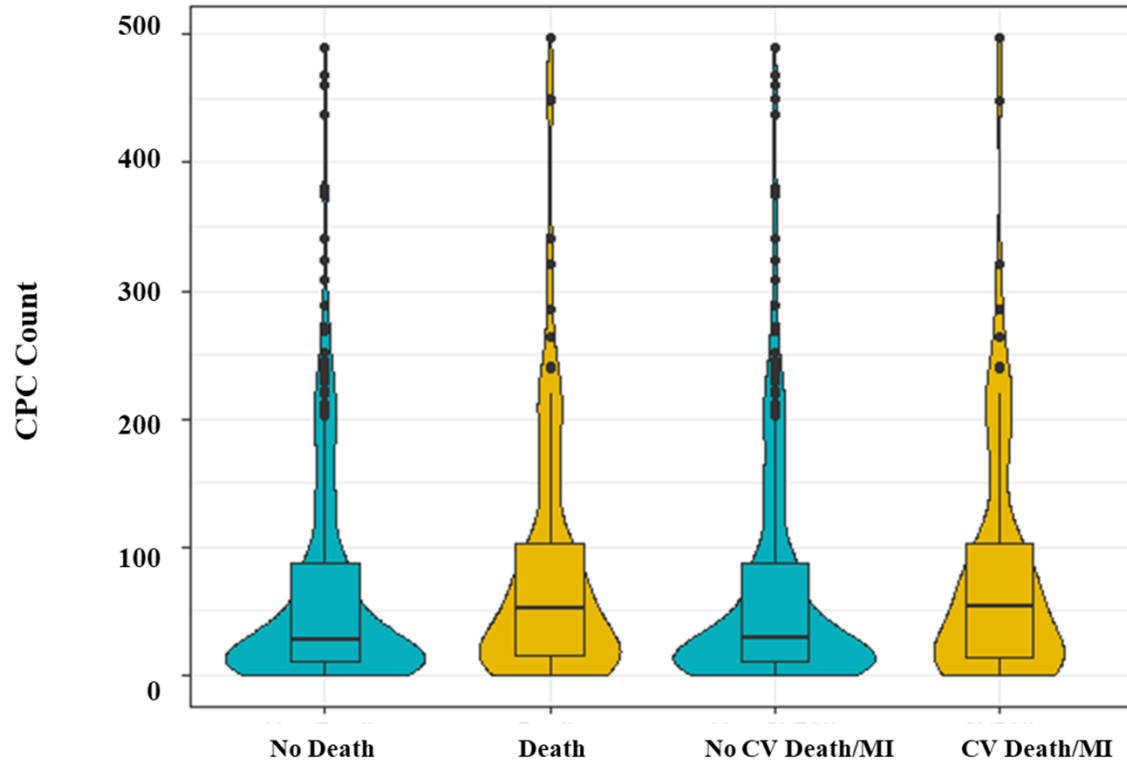

|                |                    |                    |                    |                    |
|----------------|--------------------|--------------------|--------------------|--------------------|
| <b>N</b>       | <b>318</b>         | <b>118</b>         | <b>347</b>         | <b>89</b>          |
| <b>Counts</b>  | <b>33 [11,114]</b> | <b>53 [15,111]</b> | <b>34 [12,113]</b> | <b>56 [14,109]</b> |
| <b>P-value</b> | <b>0.160</b>       |                    | <b>0.318</b>       |                    |
